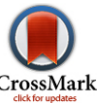

## Correction

# Correction: 4D-Analysis of Left Ventricular Heart Cycle Using Procrustes Motion Analysis

**The PLOS ONE Staff**

The legends for Figures 3 and 4 are switched. The legend that appears under Figure 3 should be under Figure 4 and the legend that appears under Figure 4 should be under Figure 3. The figure images appear in the correct order. Please see Figures 3 and 4 with their correct legends below.

The title of Figure 9 contains an error. “11 trajectories” should read “19 trajectories.” Please see Figure 9 with the correct title and legend below.

---

**Citation:** The PLOS ONE Staff (2014) Correction: 4D-Analysis of Left Ventricular Heart Cycle Using Procrustes Motion Analysis. PLoS ONE 9(4): e94673. doi:10.1371/journal.pone.0094673

**Published:** April 8, 2014

**Copyright:** © 2014 The PLOS ONE Staff. This is an open-access article distributed under the terms of the Creative Commons Attribution License, which permits unrestricted use, distribution, and reproduction in any medium, provided the original author and source are credited.

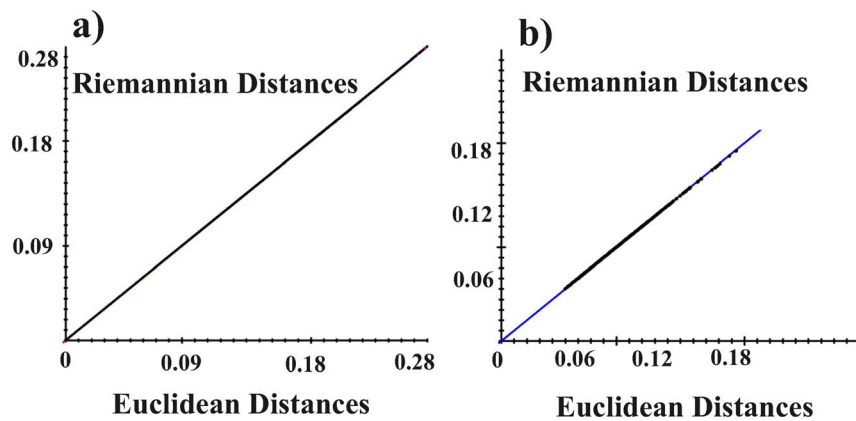

**Figure 3. The test for the assumption of eligibility of Euclidean tangent plane.** a) all reciprocal pairs of Riemannian Procrustes distances of the entire datasets (341 shapes for 19 individuals) plotted against the corresponding Euclidean Distances. Largest possible Procrustes  $d = 1.570796$ . Regression through the origin for distance in tangent space,  $Y$ , regressed onto Procrustes distance (in radians). Slope: 0.998 Correlation (uncentered): 1.00 root MS error: 0.000242. b) Riemannian distances from the consensus, i.e. the Grand Mean, are plotted against the Euclidean ones.  $Y$ , regressed onto Procrustes distance (in radians). Slope: 0.998 Correlation (uncentered): 0.999; root MS error: 0.000020. doi:10.1371/journal.pone.0086896.g003

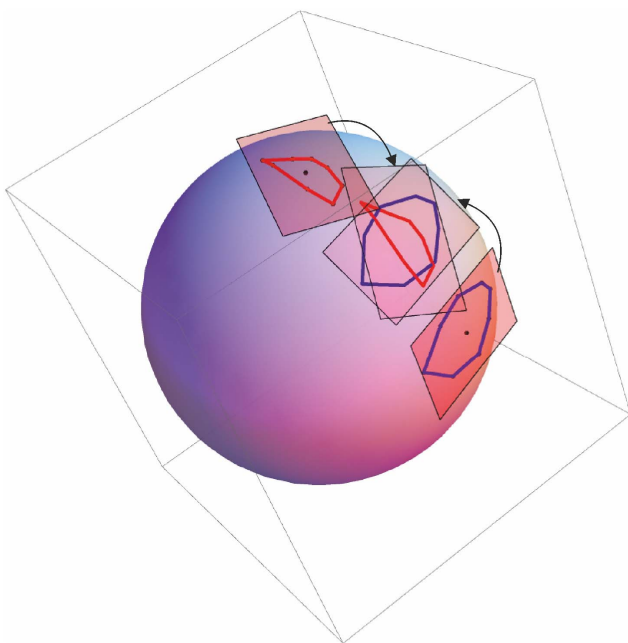

**Figure 4. Pictorial view of the Parallel Transport of tangent spaces.** Our procedure is aimed at comparing motion trajectories' shapes once removed the effect of inter-individual differences. In this picture it is shown the parallel transport of two different Euclidean planes on the tangent plane of the Grand Mean. See Figure 4 to test the eligibility of a common Euclidean plane. doi:10.1371/journal.pone.0086896.g004

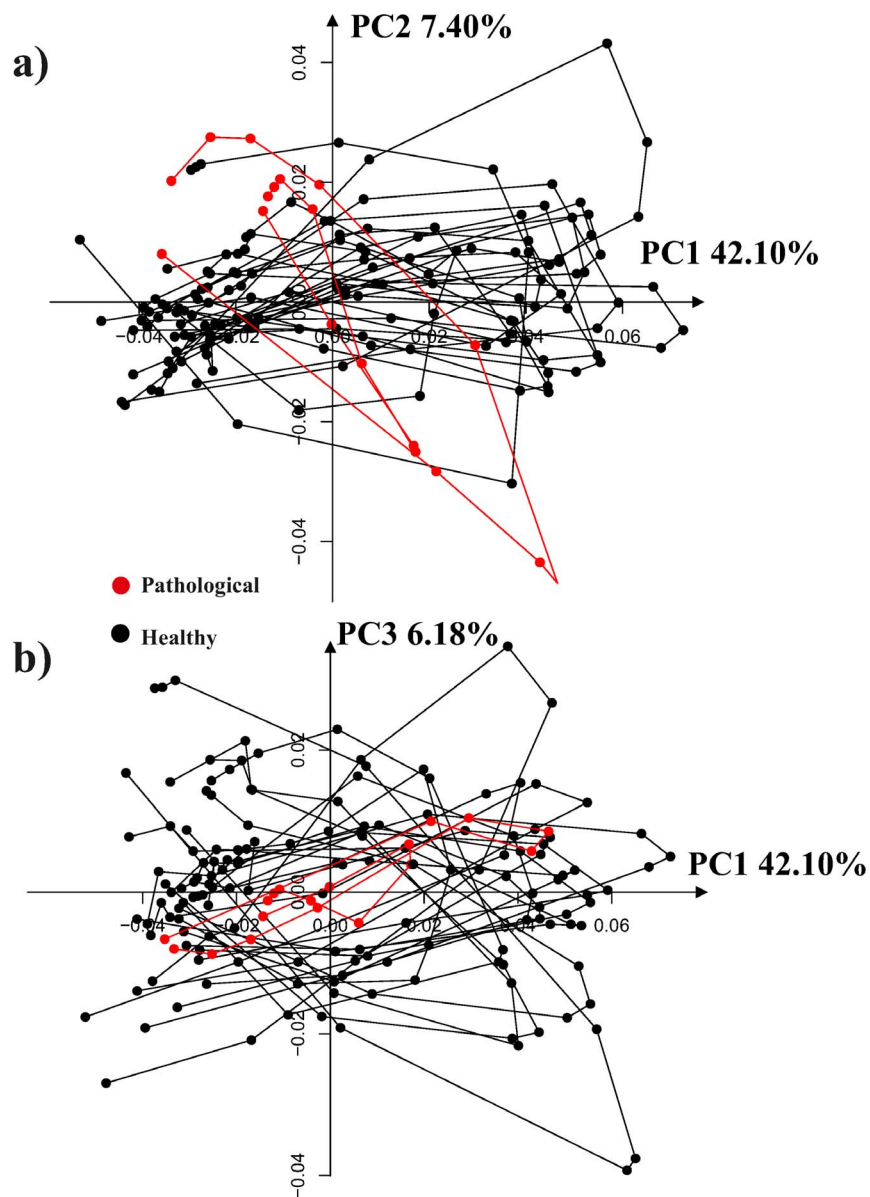

**Figure 9. PCA shape space for the 19 interpolated trajectories after the linear shift.** a) PC1/PC2 scatterplot, b) PC1/PC3 scatterplot. doi:10.1371/journal.pone.0086896.g009

## Reference

1. Piras P, Evangelista A, Gabriele S, Nardinocchi P, Teresi L, et al. (2014) 4D-Analysis of Left Ventricular Heart Cycle Using Procrustes Motion Analysis. PLoS ONE 9(1): e86896. doi:10.1371/journal.pone.0086896
